# Supplementary material for: Gαo is a major determinant of cAMP signaling in the pathophysiology of movement disorders
Source: PubMed Central journal article supplement — Cell Rep. Author manuscript; Available in PMC 2021 Feb 24. (PMC7903328; doi:10.1016/j.celrep.2021.108718), 2021-02-02
Supplement: NIHMS1669648-supplement-1.pdf [file NIHMS1669648-supplement-1.pdf]

**Cell Reports, Volume 34**

## **Supplemental Information**

### **G $\alpha$ is a major determinant of cAMP signaling in the pathophysiology of movement disorders**

**Brian S. Muntean, Ikuo Masuho, Maria Dao, Laurie P. Sutton, Stefano Zucca, Hideki Iwamoto, Dipak N. Patil, Dandan Wang, Lutz Birnbaumer, Randy D. Blakely, Brock Grill, and Kirill A. Martemyanov**

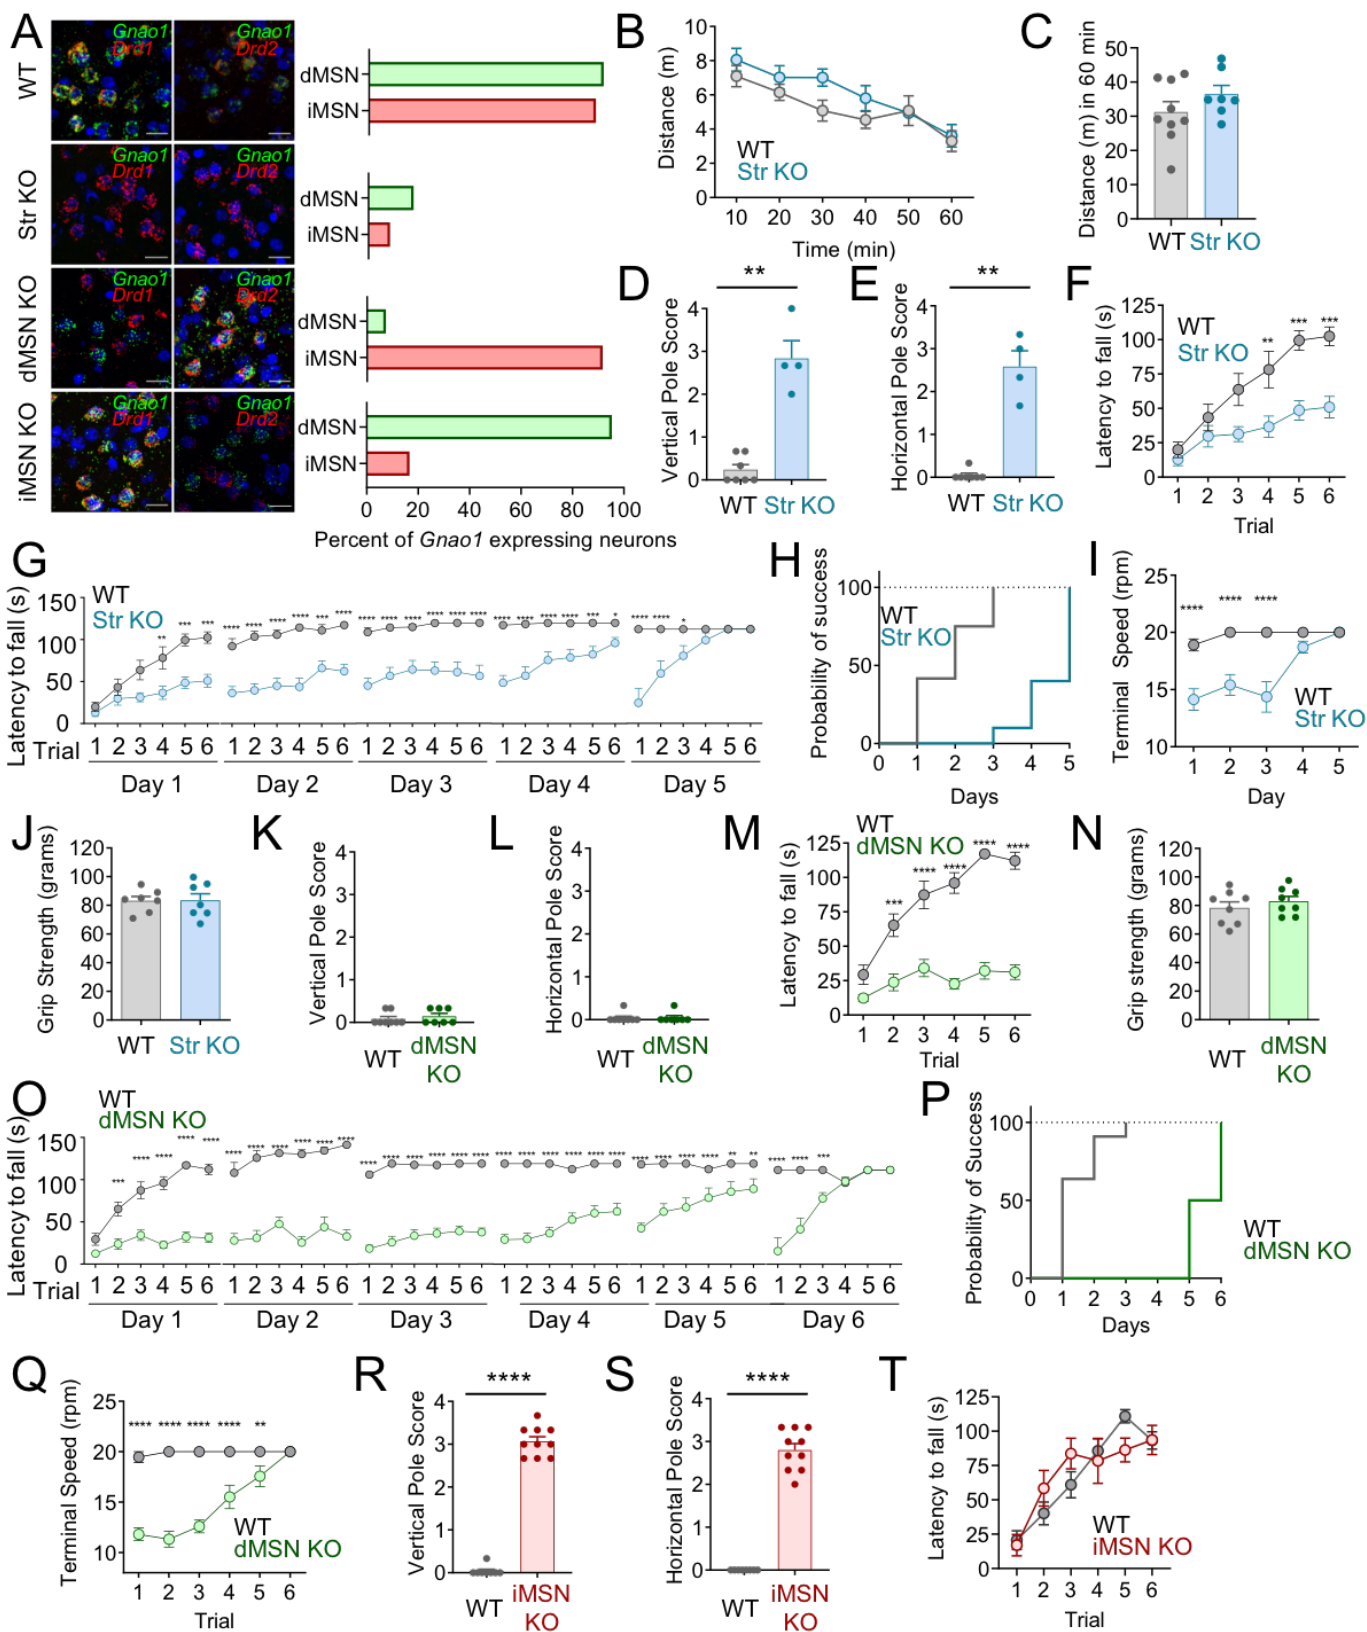

**Figure S1. Related to Figure 1. Characterization of motor behavior in mice with striatal specific elimination of  $G\alpha_o$ .**

**A)** *In situ* hybridization showing expression of *Gnao1* mRNA in dMSN (*Drd1* mRNA) and iMSN (*Drd2* mRNA) in the dorsal striatum of adult WT (*Gnao1<sup>flox/flox</sup>*; n=4 mice), Str KO (*Gnao1<sup>flox/flox</sup>:RGS9<sup>Cre</sup>*; n=2 mice), dMSN KO (*Gnao1<sup>flox/flox</sup>:Drd1a<sup>Cre</sup>*; n=2 mice), and iMSN KO (*Gnao1<sup>flox/flox</sup>:Drd2<sup>Cre</sup>*; n=2 mice). Quantification of percent of *Gnao1* expressing dMSNs or iMSNs. **B)** Time course in the open field assay. *Gnao1<sup>flox/flox</sup>* (WT; n=9) and *Gnao1<sup>flox/flox</sup>:RGS9<sup>Cre</sup>* (Str KO; n=8). **C)** Total distance traveled in the open field assay. *Gnao1<sup>flox/flox</sup>* (WT; n=9) and *Gnao1<sup>flox/flox</sup>:RGS9<sup>Cre</sup>* (Str KO; n=8), nonparametric t-test p=0.4302, Kolmogorov-Smirnov D=0.4127. **D)** Vertical pole assay pathology score for *Gnao1<sup>flox/flox</sup>* (WT; n=7) and *Gnao1<sup>flox/flox</sup>:RGS9<sup>Cre</sup>* (Str KO; n=4) mice. Nonparametric t-test p=0.0061, Kolmogorov-Smirnov D=1.000. **E)** Horizontal pole assay pathology score for *Gnao1<sup>flox/flox</sup>* (WT; n=7) and *Gnao1<sup>flox/flox</sup>:RGS9<sup>Cre</sup>* (Str KO; n=4) mice. Nonparametric t-test p=0.0030, Kolmogorov-Smirnov D=1.000. **F)** Performance of *Gnao1<sup>flox/flox</sup>* (WT; n=12) and *Gnao1<sup>flox/flox</sup>:RGS9<sup>Cre</sup>* (Str KO; n=10) littermates on intraday intervals on the accelerating rotarod. Two-way ANOVA, Bonferroni's multiple comparisons test. **G)** Daily performance of *Gnao1<sup>flox/flox</sup>* (WT; n=12) and *Gnao1<sup>flox/flox</sup>:RGS9<sup>Cre</sup>* (Str KO; n=10) mice on the accelerating rotarod over 5 days (6 trials/day). Two-way ANOVA, Bonferroni's multiple comparisons test. **H)** Probability of reaching maximal speed over 5 days of training on the accelerating rotarod for *Gnao1<sup>flox/flox</sup>* (WT; n=12) and *Gnao1<sup>flox/flox</sup>:RGS9<sup>Cre</sup>* (Str KO; n=10) mice. **I)** Time course of the terminal speed over 5 consecutive training days on the accelerating rotarod for *Gnao1<sup>flox/flox</sup>* (WT; n=12) and *Gnao1<sup>flox/flox</sup>:RGS9<sup>Cre</sup>* (Str KO; n=10) mice. Two-way ANOVA, Bonferroni's multiple comparisons test. **J)** Grip strength for *Gnao1<sup>flox/flox</sup>* (WT; n=7) and *Gnao1<sup>flox/flox</sup>:RGS9<sup>Cre</sup>* (Str KO; n=7) mice, nonparametric t-test p=0.9627, Kolmogorov-Smirnov D=0.2857. **K)** Vertical pole assay pathology score for *Gnao1<sup>flox/flox</sup>* (WT; n=8) and *Gnao1<sup>flox/flox</sup>:Drd1a<sup>Cre</sup>* (dMSN KO; n=7) mice. Nonparametric t-test p=0.6084, Kolmogorov-Smirnov D=0.1786. **L)** Horizontal pole assay pathology score for *Gnao1<sup>flox/flox</sup>* (WT; n=8) and *Gnao1<sup>flox/flox</sup>:Drd1a<sup>Cre</sup>* (dMSN KO; n=7) mice. Nonparametric t-test p>0.9999, Kolmogorov-Smirnov D=0.01786. **M)** Performance of *Gnao1<sup>flox/flox</sup>* (WT; n=11) and *Gnao1<sup>flox/flox</sup>:Drd1a<sup>Cre</sup>* (dMSN KO; n=8) littermates on intraday intervals on the accelerating rotarod. Two-way ANOVA, Bonferroni's multiple comparisons test. **N)** Grip strength for *Gnao1<sup>flox/flox</sup>* (WT; n=8) and *Gnao1<sup>flox/flox</sup>:Drd1a<sup>Cre</sup>* (dMSN KO; n=8) mice, nonparametric t-test p=0.6601, Kolmogorov-Smirnov D=0.3750. **O)** Daily performance of *Gnao1<sup>flox/flox</sup>* (WT; n=11) and *Gnao1<sup>flox/flox</sup>:Drd1a<sup>Cre</sup>* (dMSN KO; n=8) mice on the accelerating rotarod over 6 days (6 trials/day). Two-way ANOVA, Bonferroni's multiple comparisons test. **P)** Probability of reaching maximal speed over 6 days of training on the accelerating rotarod for *Gnao1<sup>flox/flox</sup>* (WT; n=11) and *Gnao1<sup>flox/flox</sup>:Drd1a<sup>Cre</sup>* (dMSN KO; n=8) mice. **Q)** Time course of the terminal speed over 6 consecutive training days on the accelerating rotarod for *Gnao1<sup>flox/flox</sup>* (WT; n=11) and *Gnao1<sup>flox/flox</sup>:Drd1a<sup>Cre</sup>* (dMSN KO; n=8) mice. Two-way ANOVA, Bonferroni's multiple comparisons test. **R)** Vertical pole assay pathology score for *Gnao1<sup>flox/flox</sup>* (WT; n=8) and *Gnao1<sup>flox/flox</sup>:Drd2<sup>Cre</sup>* (iMSN KO; n=10) mice. Nonparametric t-test p<0.0001, Kolmogorov-Smirnov D=1.000. **S)** Horizontal pole assay pathology score for *Gnao1<sup>flox/flox</sup>* (WT; n=8) and *Gnao1<sup>flox/flox</sup>:Drd2<sup>Cre</sup>* (iMSN KO; n=10) mice. Nonparametric t-test p<0.0001, Kolmogorov-Smirnov D=1.000. **T)** Performance of *Gnao1<sup>flox/flox</sup>* (WT; n=8) and *Gnao1<sup>flox/flox</sup>:Drd2<sup>Cre</sup>* (iMSN KO; n=7) littermates on intraday intervals on the accelerating rotarod. Two-way ANOVA, Bonferroni's multiple comparisons test. All data are represented as mean  $\pm$  SEM; \*p < 0.05; \*\*p < 0.01; \*\*\* p < 0.001; \*\*\*\* p < 0.0001.

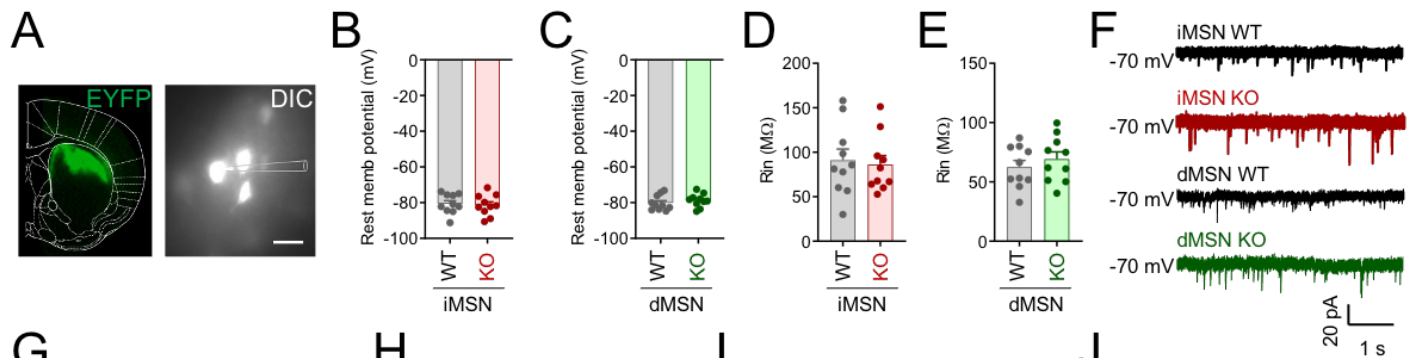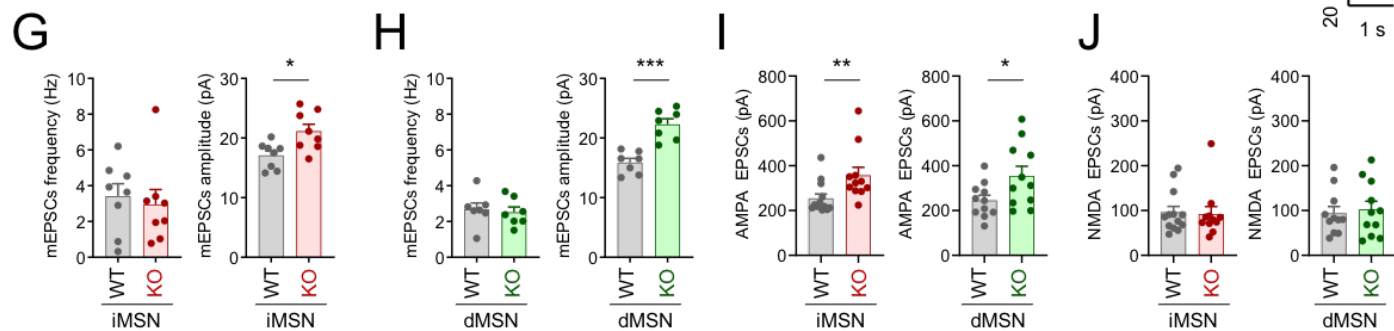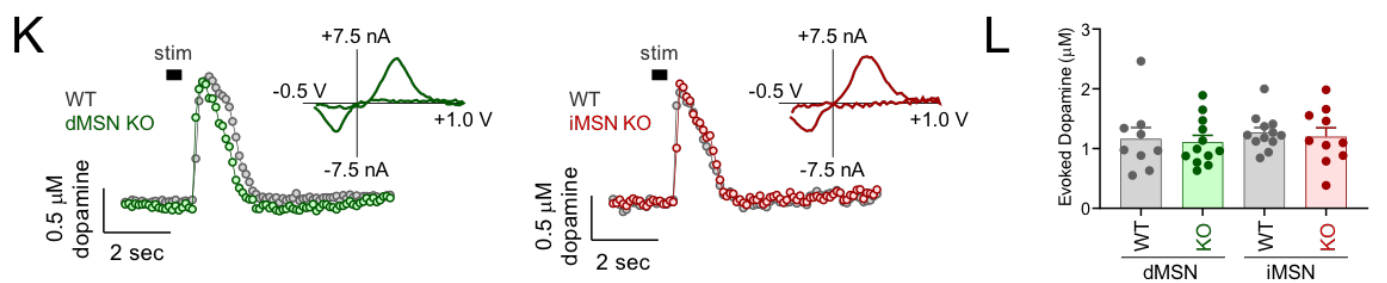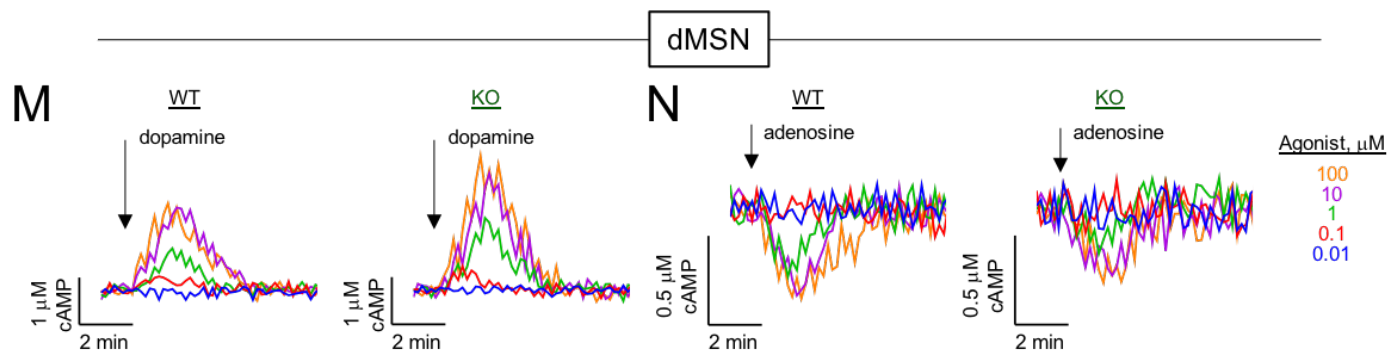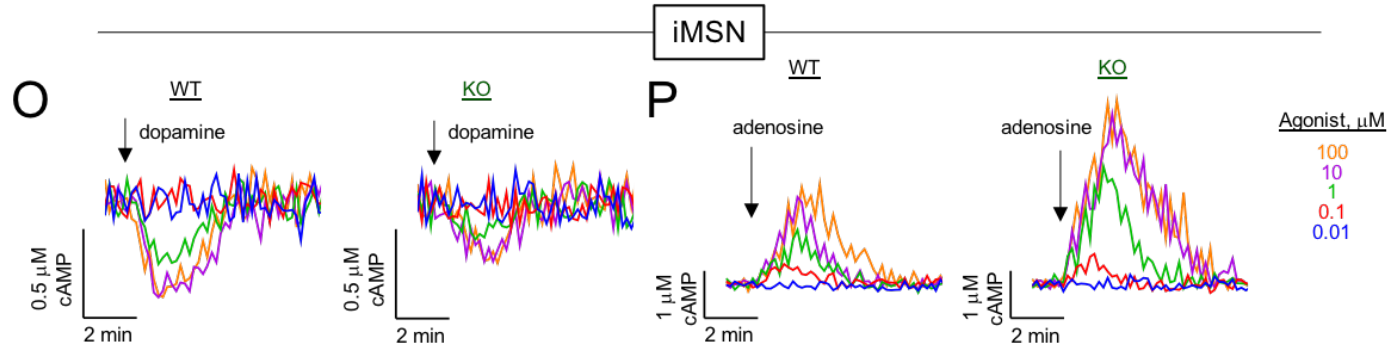

**Figure S2. Related to Figure 2. Characterization *Gnao1* inactivation in striatal neurons.** **A)** Coronal striatal section (100  $\mu\text{m}$ ) showing viral expression of EYFP targeted to dorsal striatum (left) and DIC image showing identification of EYFP MSNs in a coronal slice (300  $\mu\text{m}$ ) for electrophysiological recordings (right). **B)** Resting membrane potential of acute brain slice iMSNs from *Drd2<sup>Cre</sup>* (WT; n=7 mice/10 neurons) and *Gnao1<sup>fllox/fllox</sup>:Drd2<sup>Cre</sup>* (iMSN KO; n=5 mice/10 neurons). Nonparametric t-test; Mann-Whitney test, p=0.7394. **C)** Resting membrane potential of acute brain slice dMSNs from *Drd1a<sup>Cre</sup>* (WT; n=7 mice/10 neurons) and *Gnao1<sup>fllox/fllox</sup>:Drd1a<sup>Cre</sup>* (dMSN KO; n=6 mice/10 neurons). Nonparametric t-test; Mann-Whitney test, p=0.3930. **D)** Input resistance of acute brain slice iMSNs from *Drd2<sup>Cre</sup>* (WT; n=7 mice/10 neurons) and *Gnao1<sup>fllox/fllox</sup>:Drd2<sup>Cre</sup>* (iMSN KO; n=5 mice/10 neurons). Nonparametric t-test; Mann-Whitney test, p=0.7959. **E)** Input resistance of acute brain slice dMSNs from *Drd1a<sup>Cre</sup>* (WT; n=7 mice/10 neurons) and *Gnao1<sup>fllox/fllox</sup>:Drd1a<sup>Cre</sup>* (dMSN KO; n=6 mice/10 neurons). Nonparametric t-test; Mann-Whitney test, p=0.6305. **F)** Representative mEPSCs traces from the dorsal striatum of acute coronal brain slices. **G)** Quantification of iMSN mEPSCs frequency (nonparametric t-test; Mann-Whitney test, p=0.4418) and amplitude (nonparametric t-test; Mann-Whitney test, p=0.0148). (WT; n=4 mice/8 neurons; iMSN KO; n=3 mice/8 neurons). **H)** Quantification of dMSN mEPSCs frequency (nonparametric t-test; Mann-Whitney test, p=0.4557) and amplitude (nonparametric t-test; Mann-Whitney test, p=0.0006). (WT; n=3 mice/7 neurons; dMSN KO; n=3 mice/7 neurons). **I)** Quantification of AMPA EPSCs amplitude from *Drd2<sup>Cre</sup>* (WT; n=6 mice/13 neurons) and *Gnao1<sup>fllox/fllox</sup>:Drd2<sup>Cre</sup>* (iMSN KO; n=6 mice/11 neurons). Nonparametric t-test; Mann-Whitney test, p=0.0048. Quantification of AMPA EPSCs amplitude from *Drd1a<sup>Cre</sup>* (WT; n=6 mice/11 neurons) and *Gnao1<sup>fllox/fllox</sup>:Drd1a<sup>Cre</sup>* (dMSN KO; n=5 mice/11 neurons). Nonparametric t-test; Mann-Whitney test, p=0.0473. **J)** Quantification of NMDA EPSCs amplitude from *Drd2<sup>Cre</sup>* (WT; n=6 mice/13 neurons) and *Gnao1<sup>fllox/fllox</sup>:Drd2<sup>Cre</sup>* (iMSN KO; n=6 mice/11 neurons). Nonparametric t-test; Mann-Whitney test, p=0.6905. Quantification of NMDA EPSCs amplitude from *Drd1a<sup>Cre</sup>* (WT; n=6 mice/11 neurons) and *Gnao1<sup>fllox/fllox</sup>:Drd1a<sup>Cre</sup>* (dMSN KO; n=5 mice/11 neurons). Nonparametric t-test; Mann-Whitney test, p=0.9487. **K)** Representative traces of fast scan cyclic voltammetry (FSCV) and triangular waveform measuring evoked dopamine in response to electrical stimulation from the dorsal striatum of acute coronal brain slices. **L)** Quantification of evoked dopamine between dMSN WT (2 animals, 9 slices), dMSN KO (2 animals, 12 slices), iMSN WT (2 animals, 12 slices), and iMSN KO (2 animals, 9 slices). **M)** Representative traces of dopamine-induced cAMP responses in dMSNs from *Gnao1<sup>fllox/fllox</sup>* (WT) and *Gnao1<sup>fllox/fllox</sup>:RGS9<sup>Cre</sup>* (dMSN KO). **N)** Representative traces of adenosine-induced cAMP responses in dMSNs from *Gnao1<sup>fllox/fllox</sup>* (WT) and *Gnao1<sup>fllox/fllox</sup>:RGS9<sup>Cre</sup>* (dMSN KO). **O)** Representative traces of dopamine-induced cAMP responses in iMSNs from *Gnao1<sup>fllox/fllox</sup>* (WT) and *Gnao1<sup>fllox/fllox</sup>:RGS9<sup>Cre</sup>* (iMSN KO). **P)** Representative traces of adenosine-induced cAMP responses in iMSNs from *Gnao1<sup>fllox/fllox</sup>* (WT) and *Gnao1<sup>fllox/fllox</sup>:RGS9<sup>Cre</sup>* (iMSN KO). All data are represented as mean  $\pm$  SEM; \*p < 0.05; \*\*p < 0.01; \*\*\* p < 0.001; \*\*\*\* p < 0.0001.

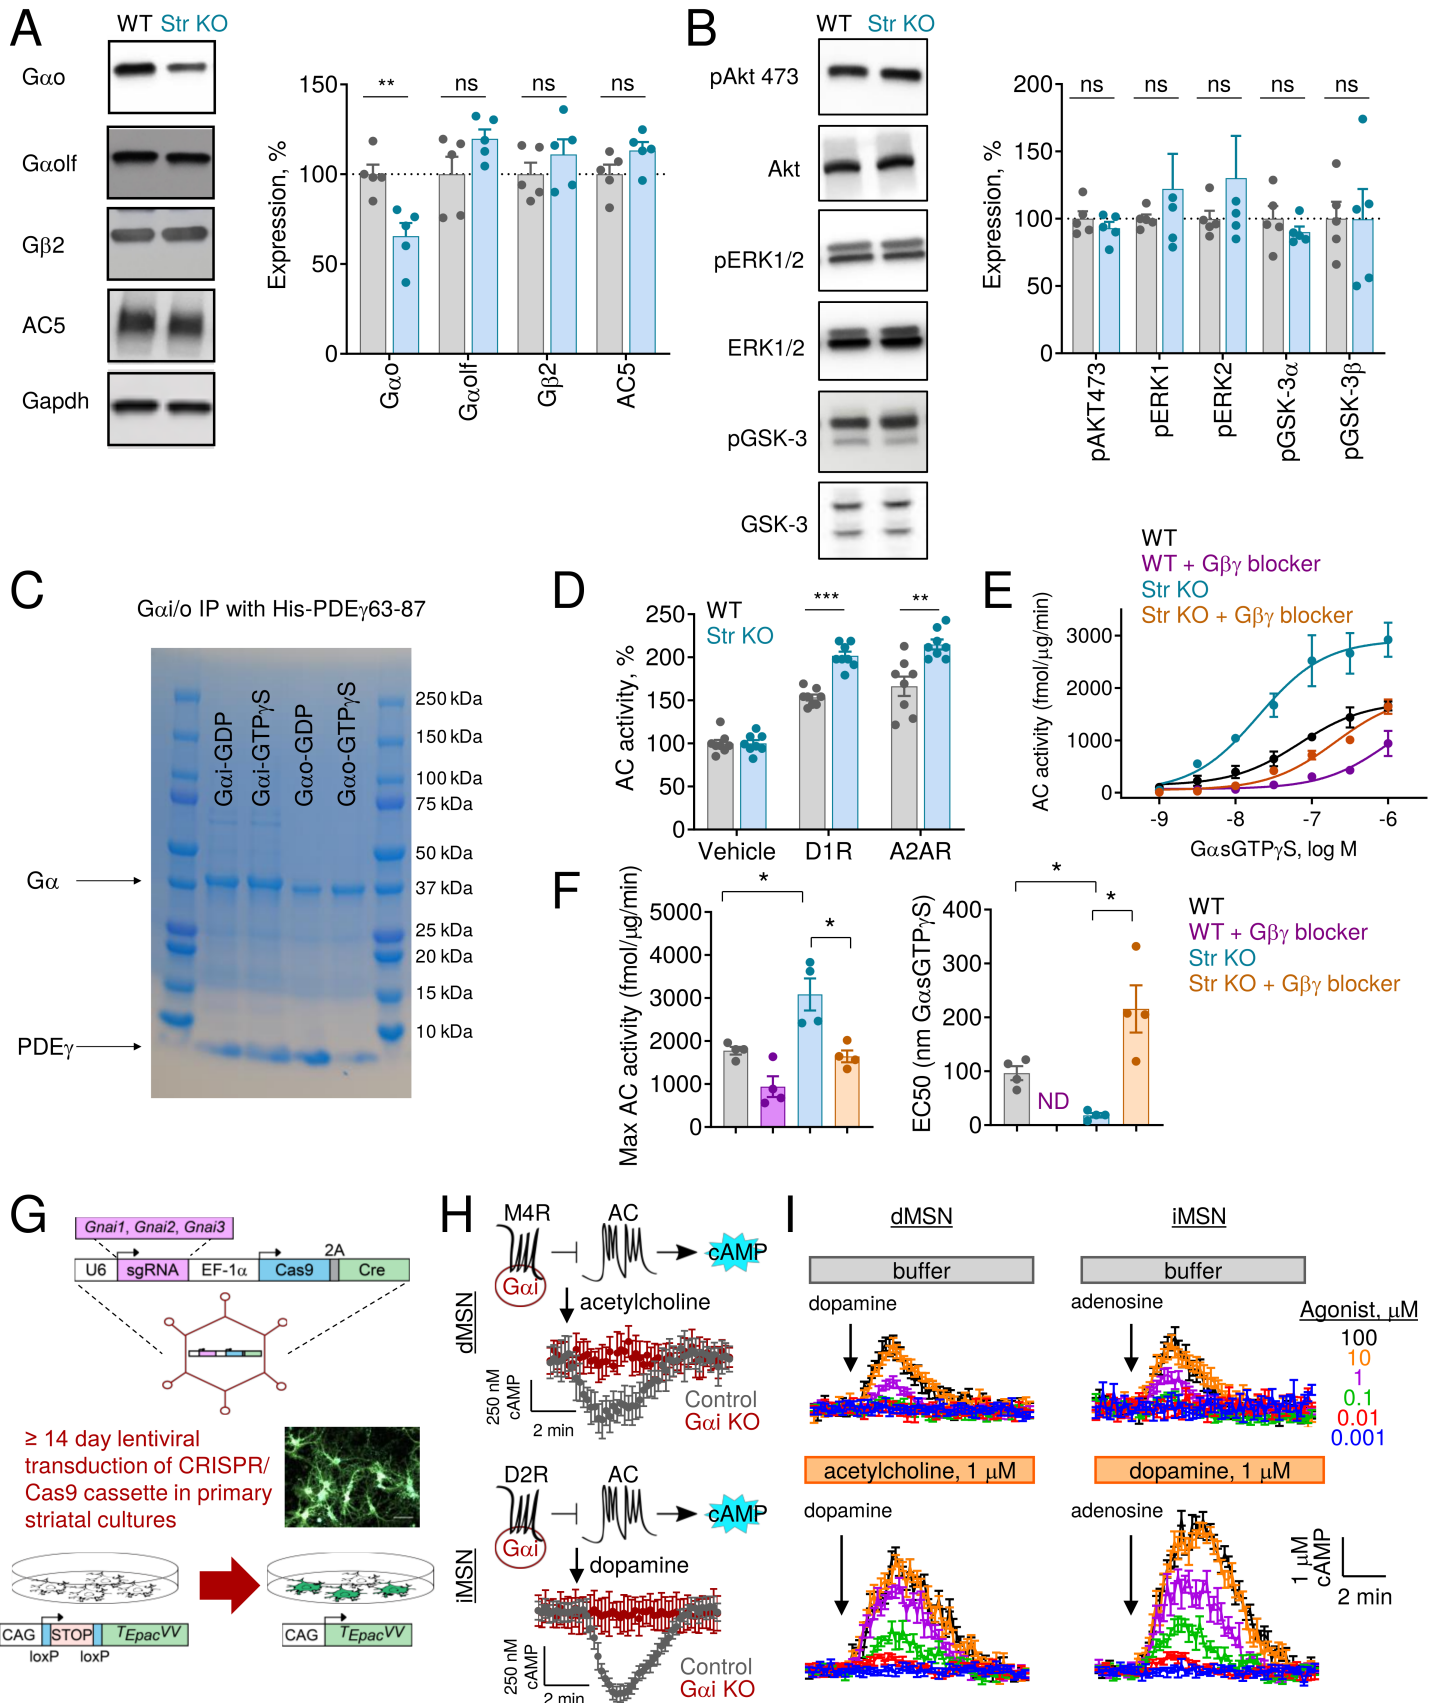

**Figure S3. Related to Figure 3. Biochemical characterization of striatal tissues lacking *Gαo*.**

**A)** Western blot analysis of striatal tissue punches from *Gnao1<sup>fllox/fllox</sup>* (WT; n=5) and *Gnao1<sup>fllox/fllox</sup>:RGS9<sup>Cre</sup>* (Str KO; n=5) mice to examine *Gαo* (nonparametric t-test; Mann-Whitney test, p=0.0079), *Gαolf* (nonparametric t-test; Mann-Whitney test, p=0.2222), *Gβ2* (nonparametric t-test; Mann-Whitney test, p=0.2698), and *AC5* (nonparametric t-test; Mann-Whitney test, p=0.0952). **B)** Western blot analysis of striatal tissue punches from *Gnao1<sup>fllox/fllox</sup>* (WT; n=5) and *Gnao1<sup>fllox/fllox</sup>:RGS9<sup>Cre</sup>* (Str KO; n=5) mice to examine pAKT 473 (nonparametric t-test; Mann-Whitney test, p=0.5476), pERK1 (nonparametric t-test; Mann-Whitney test, p=0.8413), pERK2 (nonparametric t-test; Mann-Whitney test, p=0.6905), pGSK-3α (nonparametric t-test; Mann-Whitney test, p=0.3095), and pGSK-3β (nonparametric t-test; Mann-Whitney test, p>0.9999). **C)** Representative coomassie gel of *in vitro* immunoprecipitation between recombinant fragment of PDEγ with *Gαi*-GDP, *Gαi*-GTPγS, *Gαo*-GDP, or *Gαo*-GTPγS (n=3). **D)** Efficacy of vehicle (p>0.9999), D1R agonist (10 μM SKF81297; p=0.0002) and A2AR agonist (10 μM CGS21680; p=0.0031) on striatal AC activity (n=8 experiments), nonparametric t-test; Mann-Whitney test. **E)** *Gαs*-GTPγS dose response on striatal membranes in presence of a *Gβγ* scavenger (Grk2i peptide). n=4 experiments. **F)** Efficacy of *Gαs*-GTPγS, WT vs Str KO (nonparametric t-test; Mann-Whitney test, p=0.0286); Str KO vs Str KO + *Gβγ* scavenger (nonparametric t-test; Mann-Whitney test, p=0.0286). EC50 to *Gαs*-GTPγS, WT vs Str KO (nonparametric t-test; Mann-Whitney test, p=0.0286); Str KO vs Str KO + *Gβγ* scavenger (nonparametric t-test; Mann-Whitney test, p=0.0286). n=4 experiments. **G)** Schematic of *Gαi* KO utilizing CRISPR/Cas9 in cAMP Encoded Reporter (CAMPER) primary striatal neurons to simultaneously express the <sup>T</sup>Epac<sup>VV</sup> biosensor. **H)** Average traces of *Gαi* KO (n=9 neurons) or control (n=10 neurons) dMSN response to acetylcholine (top) and iMSN response to dopamine (n= 30 neurons/control; 26 neurons *Gαi* KO) (bottom). **I)** Average traces of dopamine-induced cAMP response in *Gαi* KO dMSNs in the presence (n≥6 neurons/dose) or absence of acetylcholine (n=10 neurons/dose) (left). Average traces of adenosine-induced cAMP response in *Gαi* KO iMSNs in the presence (n≥5 neurons/dose) or absence of dopamine (n=10 neurons/dose) (right). All data are represented as mean ± SEM; \*p < 0.05; \*\*p < 0.01; \*\*\* p < 0.001; \*\*\*\* p < 0.0001.

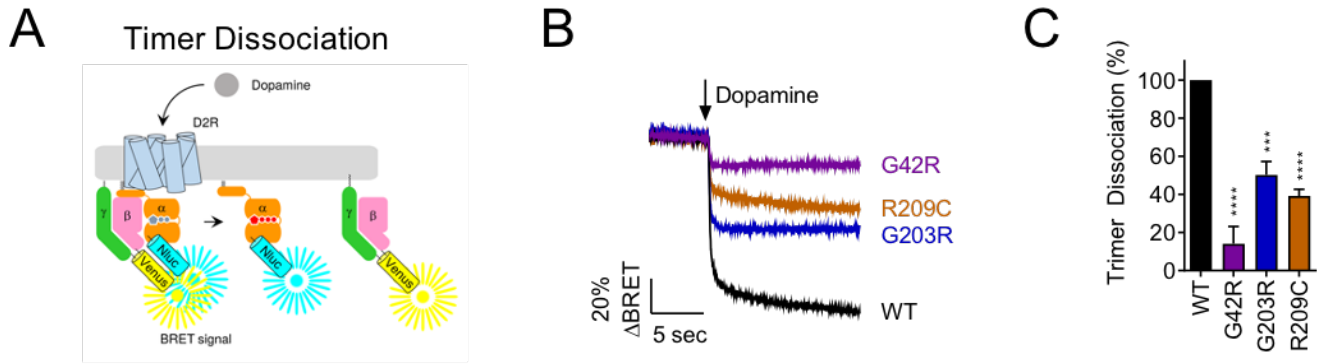

**Figure S4. Related to Figure 4. Direct dissociation of Gαo and Gβγ subunits.**

**A)** Assay design to monitor direct dissociation of Gαo from Gβγ. HEK293T/17 cells were transfected with plasmids encoding Flag-D2R, Gαo-Nluc, and Venus-Gβ1γ2. Dopamine application to the transfected cells induces dissociation of Gαo from Venus-Gβ1γ2, which decreases BRET ratio through loss of interaction with Venus-Gβ1γ2. **B)** Timecourse of agonist-mediated dissociation of Gαo and Venus-Gβ1γ2. **C)** Effect of mutations on trimer dissociation measured by change in BRET ratio. The ratio obtained with wild-type Gαo is designated as 100% trimer dissociation. The mean ± SEM of three independent experiments is shown in the bar graph. One-way ANOVA followed by Dunnett's multiple comparisons tests was conducted to determine the effect of genetic variants on the functions of Gαo with WT. \*p < 0.05; \*\*p < 0.01; \*\*\* p < 0.001; \*\*\*\* p < 0.0001.



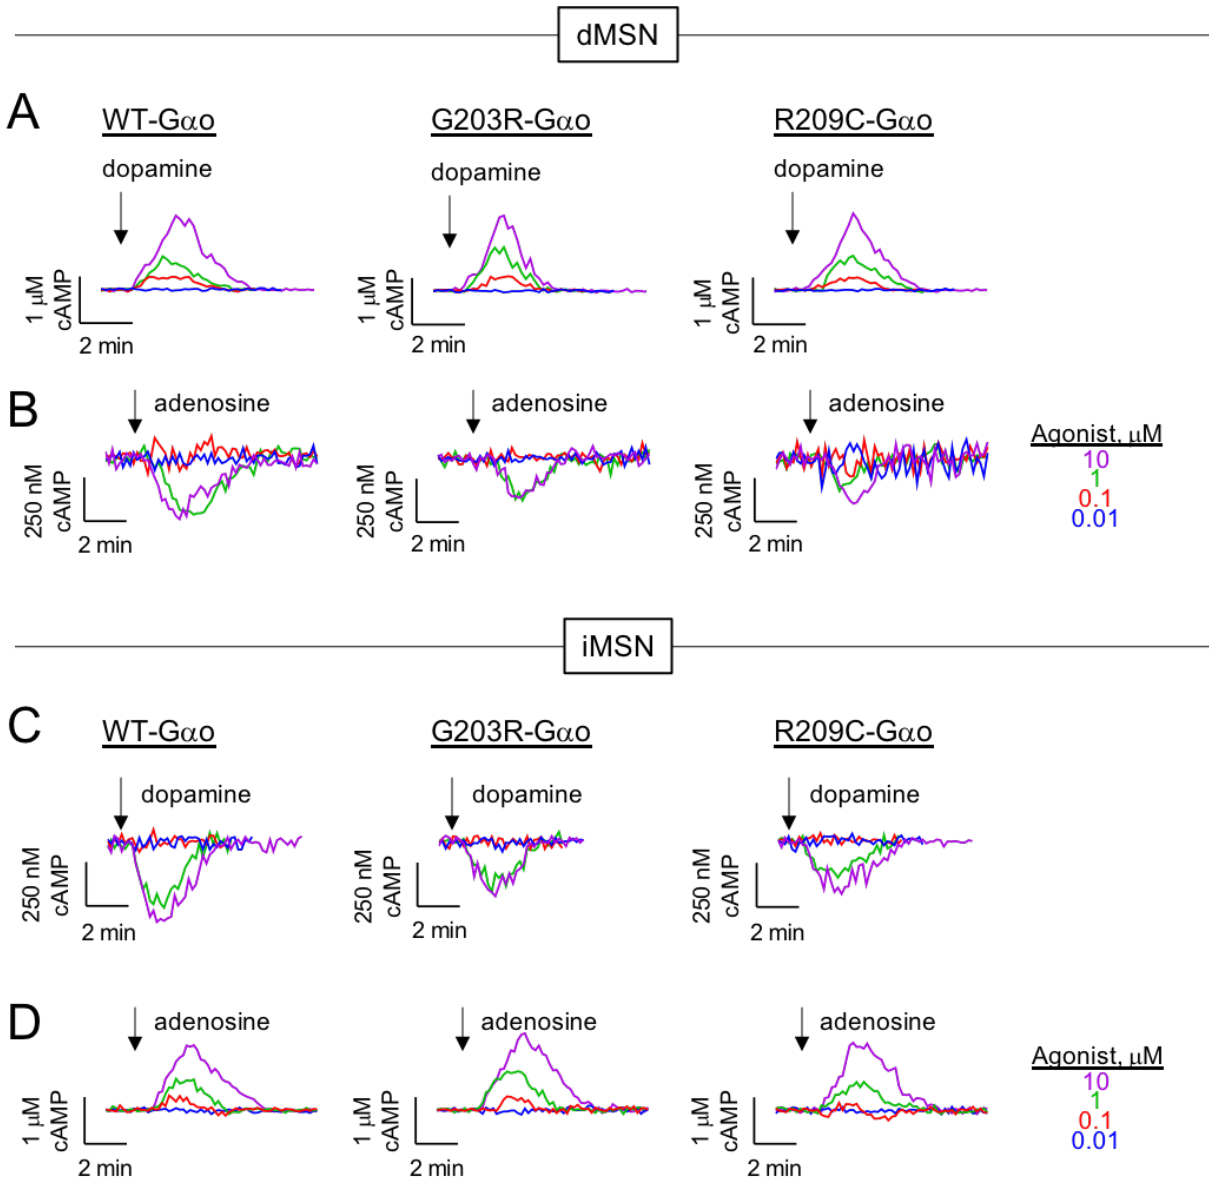

**Figure S5. Related to Figure 5. *GNAO1* influence on dopamine and adenosine-mediated cAMP signaling in primary striatal neurons.**

**A)** Average cAMP responses to dopamine dose response from *Gnao1<sup>lox/lox</sup>* dMSNs transfected with the indicated G $\alpha$ o construct. n (# neurons)= No G $\alpha$  (13), WT G $\alpha$ o (10), G203R (8), R209C (10). **B)** Average cAMP responses to adenosine dose response from *Gnao1<sup>lox/lox</sup>* dMSNs transfected with the indicated G $\alpha$ o construct. n (# neurons)= No G $\alpha$  (13), WT G $\alpha$ o (12), G203R (13), R209C (14). **C)** Average cAMP responses to dopamine dose response from *Gnao1<sup>lox/lox</sup>* iMSNs transfected with the indicated G $\alpha$ o construct. n (# neurons)= No G $\alpha$  (12), WT G $\alpha$ o (6), G203R (8), R209C (7). **D)** Average cAMP responses to adenosine dose response from *Gnao1<sup>lox/lox</sup>* iMSNs transfected with the indicated G $\alpha$ o construct. n (# neurons)= No G $\alpha$  (12), WT G $\alpha$ o (13), G203R (12), R209C (13).

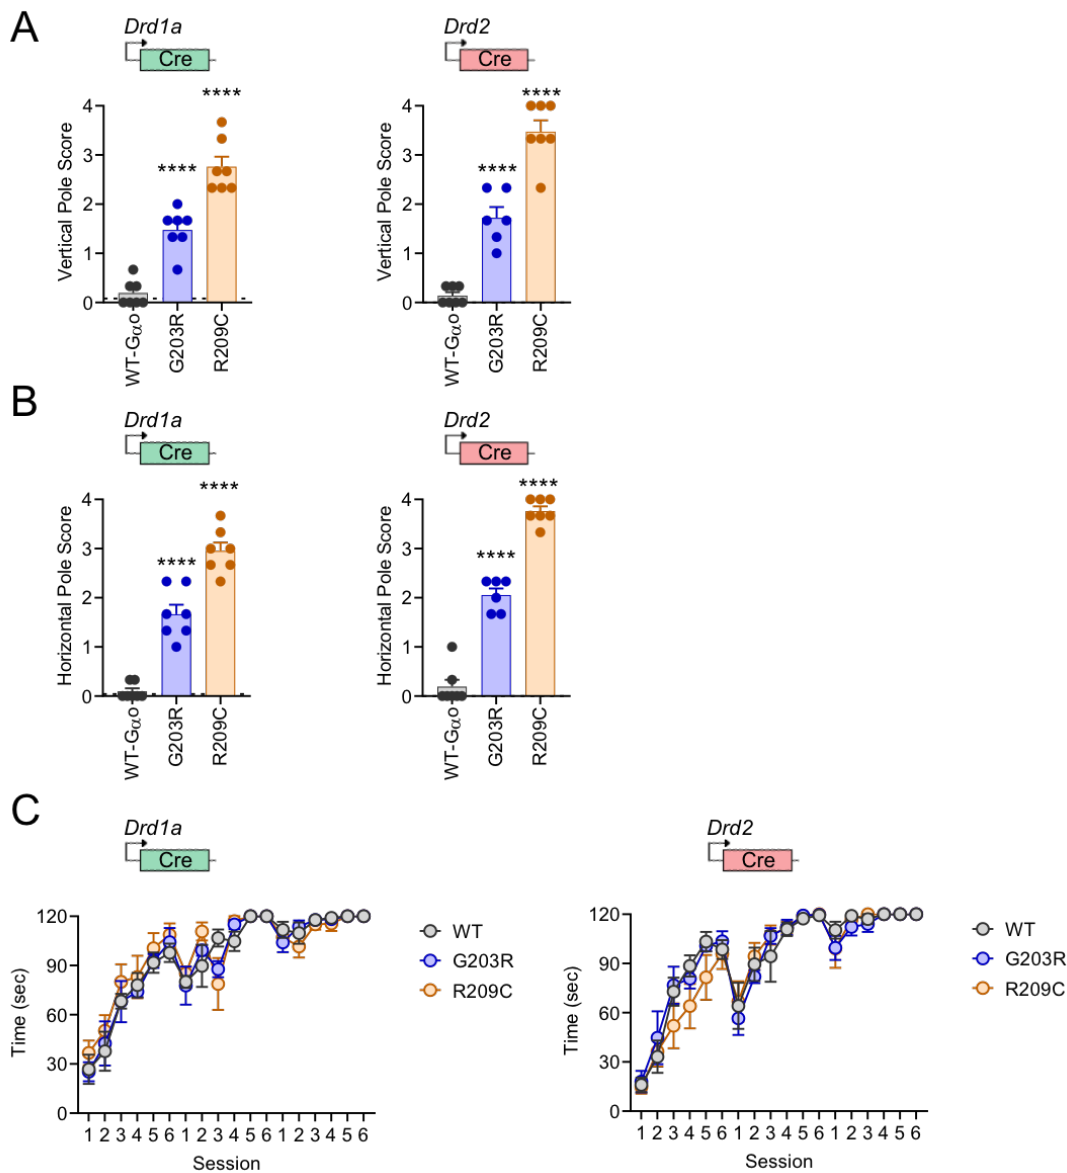

**Figure S6. Related to Figure 6. Characterization of motor behavior in mice with striatal specific expression of GNAO1 clinical variants.**

**A)** Vertical pole assay pathology score for *Drd1a*<sup>Cre</sup> mice expressing WT Gαo (n=7), G203R Gαo (n=7), or R209C Gαo (n=7). One-way ANOVA, Dunnett's multiple comparisons test; WT vs G203R p<0.0001, WT vs R209C p<0.0001 (left). Vertical pole assay pathology score for *Drd2*<sup>Cre</sup> mice expressing WT Gαo (n=7), G203R Gαo (n=6), or R209C Gαo (n=7). One-way ANOVA, Dunnett's multiple comparisons test; WT vs G203R p<0.0001, WT vs R209C p<0.0001 (right). **B)** Horizontal pole assay pathology score for *Drd1a*<sup>Cre</sup> mice expressing WT Gαo (n=7), G203R Gαo (n=7), or R209C Gαo (n=7). One-way ANOVA, Dunnett's multiple comparisons test; WT vs G203R p<0.0001, WT vs R209C p<0.0001 (left). Horizontal pole assay pathology score for *Drd2*<sup>Cre</sup> mice expressing WT Gαo (n=7), G203R Gαo (n=6), or R209C Gαo (n=7). One-way ANOVA, Dunnett's multiple comparisons test; WT vs G203R p<0.0001, WT vs R209C p<0.0001 (right). **C)** Daily performance on the accelerating rotarod over 3 days (6 trials/day) of *Drd1a*<sup>Cre</sup> mice expressing WT Gαo (n=4), G203R Gαo (n=4), or R209C Gαo (n=4) and *Drd2*<sup>Cre</sup> mice expressing WT Gαo (n=4), G203R Gαo (n=4), or R209C Gαo (n=4).

**Table S1.** Oligonucleotide information. Related to STAR Methods.

| <b>Name</b>      | <b>Sequence</b>              |
|------------------|------------------------------|
| Gnai1 sgRNA 1 FW | 5'-CACCGACGCTGCCGAATCGTTCAGC |
| Gnai1 sgRNA 1 RV | 5'-AAACGCTGAACGATTCGGCAGCGTC |
| Gnai1 sgRNA 2 FW | 5'-CACCGGGTAGGATTATCCACGAAGC |
| Gnai1 sgRNA 2 RV | 5'-AAACGCTTCGTGGATAATCCTACCC |
| Gnai1 sgRNA 3 FW | 5'-CACCGCTCCCGGGATCTGTTGAAGC |
| Gnai1 sgRNA 3 RV | 5'-AAACGCTTCAACAGATCCCGGGAGC |
| Gnai2 sgRNA 1 FW | 5'-CACCGGTGCCGGCAGTACCGTGCCG |
| Gnai2 sgRNA 1 RV | 5'-AAACCGGCACGGTACTGCCGGCACC |
| Gnai2 sgRNA 2 FW | 5'-CACCGAGGGCACGCACCGCACGCTG |
| Gnai2 sgRNA 2 RV | 5'-AAACCAGCGTGCGGTGCGTGCCCTC |
| Gnai2 sgRNA 3 FW | 5'-CACCGTTCTCGTGAGCGGCCAAAGC |
| Gnai2 sgRNA 3 RV | 5'-AAACGCTTTGGCCGCTCACGAGAAC |
| Gnai3 sgRNA 1 FW | 5'-CACCGCATTGCAATCATACGAGCCA |
| Gnai3 sgRNA 1 RV | 5'-AAACTGGCTCGTATGATTGCAATGC |
| Gnai3 sgRNA 2 FW | 5'-CACCGATCAATCTTCAACCGTCCCA |
| Gnai3 sgRNA 2 RV | 5'-AAACTGGGACGGTTGAAGATTGATC |
| Gnai3 sgRNA 3 FW | 5'-CACCGATTAAACGTTTATGGCGAGA |
| Gnai3 sgRNA 3 RV | 5'-AAACTCTCGCCATAAACGTTTAATC |

**Table S2.** F-test parameters for dose-response experiments.

| <b>Figure</b> | <b>Comparison</b>             | <b>F (DFn, Dfd)</b> | <b>p value</b> |
|---------------|-------------------------------|---------------------|----------------|
| 2I            | WT vs dMSN KO                 | 4.321 (1, 132)      | 0.0396         |
| 2J            | WT vs dMSN KO                 | 0.1574 (1, 134)     | 0.6922         |
| 2K            | WT vs IMSN KO                 | 0.02787 (1, 117)    | 0.8677         |
| 2L            | WT vs IMSN KO                 | 2.038 (1, 117)      | 0.1561         |
| 3C            | -Gbg vs +Gbg                  | 1.613 (1, 113)      | 0.2067         |
| 3F            | WT vs Str KO                  | 18.41 (1, 138)      | <0.0001        |
| 3L            | buffer vs acetylcholine       | 27.10 (1, 95)       | <0.0001        |
| 3Q            | buffer vs dopamine            | 4.333 (1, 91)       | 0.0402         |
| S3E           | WT vs Str KO                  | 2.672 (1, 50)       | 0.1084         |
| S3E           | Str KO vs Str KO +Gbg blocker | 7.561 (1, 50)       | 0.0083         |
| 5B            | WT Gao vs No Gao              | 0.1057 (1, 86)      | 0.7459         |
| 5B            | WT Gao vs G203R Gao           | 8.968 (1, 66)       | 0.0039         |
| 5B            | WT Gao vs R209C Gao           | 0.2986 (1, 74)      | 0.5864         |
| 5D            | WT Gao vs No Gao              | 1.611 (1, 94)       | 0.2075         |
| 5D            | WT Gao vs G203R Gao           | 0.02029 (1, 94)     | 0.887          |
| 5D            | WT Gao vs R209C Gao           | 1.219 (1, 98)       | 0.2723         |
| 5F            | WT Gao vs No Gao              | 1.091 (1, 66)       | 0.3001         |
| 5F            | WT Gao vs G203R Gao           | 0.3727 (1, 50)      | 0.5443         |
| 5F            | WT Gao vs R209C Gao           | 0.3380 (1, 46)      | 0.5638         |
| 5H            | WT Gao vs No Gao              | 0.004690 (1, 94)    | 0.9455         |
| 5H            | WT Gao vs G203R Gao           | 8.968 (1, 66)       | 0.0039         |
| 5H            | WT Gao vs R209C Gao           | 0.006707 (1, 98)    | 0.9349         |
